# Supplementary material
Source: PubMed Central journal article supplement (PMC4875814)
Supplement: NIHMS773006-supplement-1.pdf [file NIHMS773006-supplement-1.pdf]

**Table 1. Primer Sequences**

| Gene Name                           | Sequence                                                                                 | Accession Number |
|-------------------------------------|------------------------------------------------------------------------------------------|------------------|
| Amphiregulin<br>( <i>Areg</i> )     | For: 5'-GGT CTT AGG CTC AGG CCA TTA-3'<br>Rev: 5'-CGC TTA TGG TGG AAA CCT CTC-3'         | NM_009704.3      |
| CCL17<br>Ccl17)                     | For: 5'-TAC CAT GAG GTC ACT TCA GAT GC-3'<br>Rev: 5'-GCA CTC TCG GCC TAC ATT GG-3'       | NM_011332        |
| GAPDH<br>( <i>Gapdh</i> )           | For: 5'-AGG TCG GTG TGA ACG GAT TTG-3'<br>Rev: 5'-TGT AGA CCA TGT AGT TGA GGT-3'         | NM_008084.3      |
| IL-4<br>( <i>Il4</i> )              | For: 5'-TCT GCA TCC CGT TGT TTT GC-3'<br>Rev: 5'-GCA CCT GTG CAT CCT GAA TG-3'           | NM_001008700     |
| IL-9<br>( <i>Il9</i> )              | For: 5'-TTG TGT TCT TCC GTC CCA A-3'<br>Rev: 5'-ACA GTG TGT TGC CTG CCA T-3'             | NM_008373        |
| IL-12p40<br>( <i>Il12b</i> )        | For: 5'-TGT GGA ATG GCG TCT CTG T-3'<br>Rev: 5'-GGG TCT GGT TTG ATG ATG TCC-3'           | NM_001303244.1   |
| IL-13<br>( <i>Il13</i> )            | For: 5'-TCT GTG TCT CTC CCT CTG A-3'<br>Rev: 5'-ATC CTC TGG GTC CTG TAG A-3'             | NM_008355.3      |
| RELM- $\alpha$<br>( <i>Retnla</i> ) | For: 5'-GCT CTT CCC TTT CCT TCT CCA A-3'<br>Rev: 5'-AAC ACA GTG TAG GCT TCA TGC TGT A-3' | NM_020509.3      |

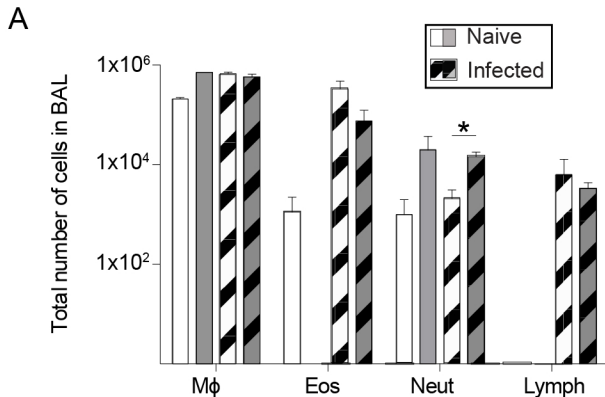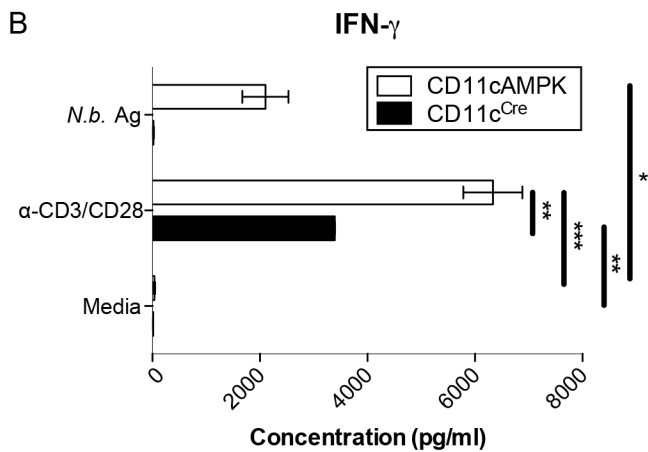

**Figure S1. AMPK deficiency in myeloid cells results in pulmonary inflammation.**

A) Total number of cell counts for macrophages (M $\phi$ ), eosinophils (Eos), neutrophils (Neut), and lymphocytes (Lymph) present in the BAL of naive (solid bars) and *N.b.*-infected (hatched bars) CD11c<sup>Cre</sup> (white) and CD11cAMPK (gray) mice. 200x magnification. n=4/group. Data represents 3 independent experiments. B) Five to six CD11cAMPK and CD11c<sup>Cre</sup> mice were infected s.c. with 650 L<sub>3</sub> *N.b.* Nine days post-infection, spleens were harvested to obtain single cell suspension. 500,000 cells were seeded per well for each mouse. Cells were stimulated with either 10  $\mu$ g/ml of crude whole *N.b.* antigen (*N.b.* Ag) or 1  $\mu$ g/ml anti-CD3/CD28 antibody. Control wells were incubated in media only. Cells were incubated 48-72 hrs in 5% CO<sub>2</sub> at 37°C and supernatants were collected for analysis by IFN- $\gamma$ -specific ELISA. Statistical analysis was performed by One-way ANOVA using GraphPad Prism. \*p<0.05, \*\*p<0.01, \*\*\*p<0.001.

WT

CD11cAMPK

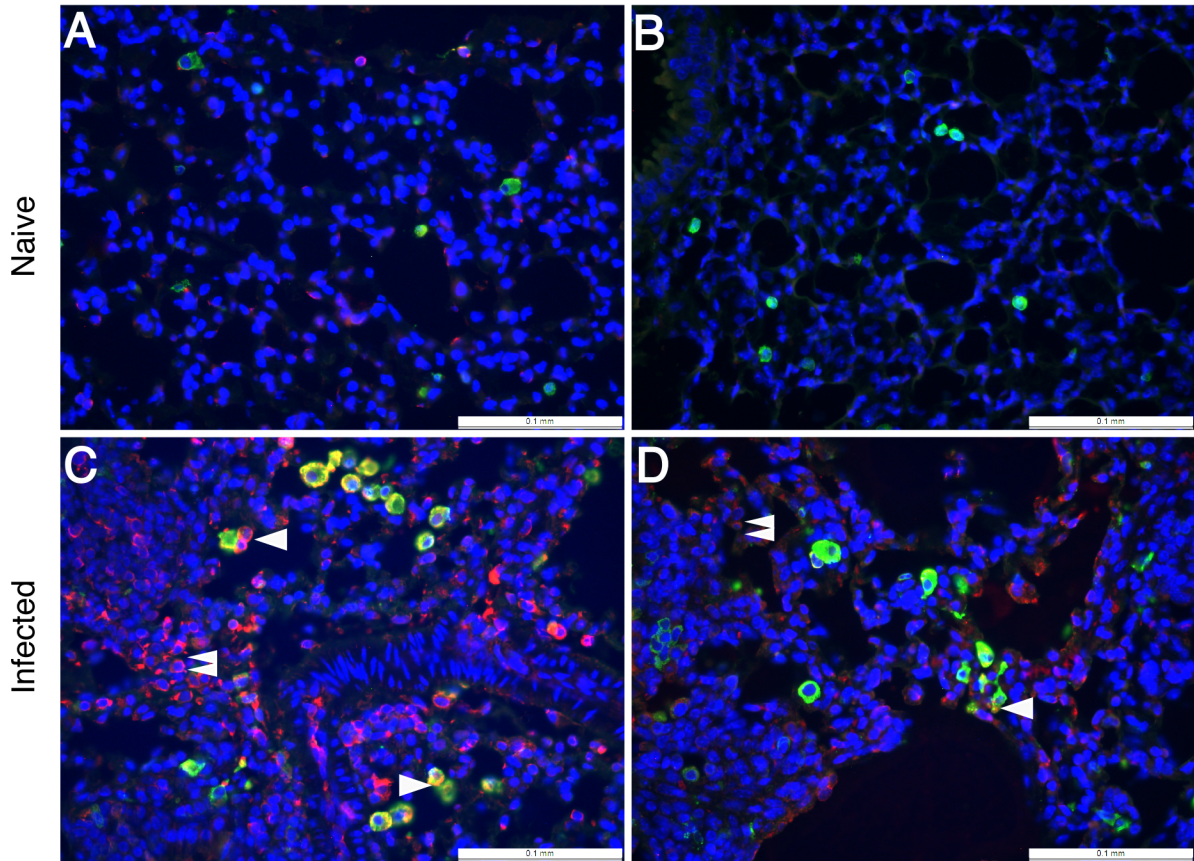

**Figure S2. Hookworm-infected CD11cAMPK mice have reduced lymphocyte recruitment and M2 cell interactions in the lung.** Paraffin-embedded lung tissue cross-sections were labeled with rabbit anti-mouse GPR44 (Biorbyt) and detected with a Cy-3-conjugated donkey anti-rabbit IgG to identify lymphocytes (red). Macrophages were detected using a goat anti-mouse Ym-1 (R&D Systems) primary and AF488-conjugated donkey anti-goat IgG secondary antibody (green). DAPI stain was used to label nuclei (blue). Naive A,B) and C,D) *N.b.*-infected (9 dpi) WT and CD11cAMPK mice. Lymphocytes (double white arrow), Lymphocyte:Macrophage interaction (white arrow). 400x magnification. Image is representative of 3 mice per group.

A

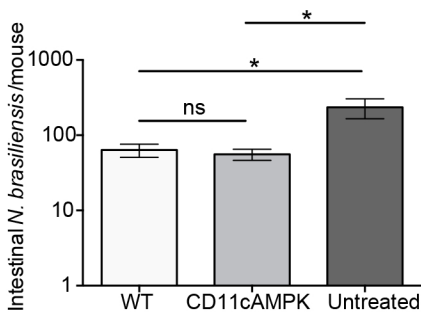

B

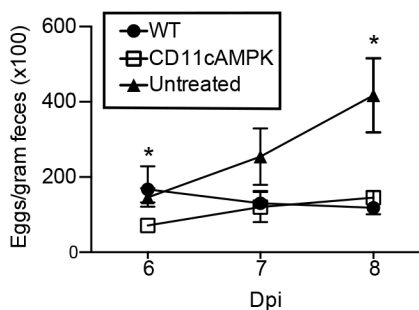

C

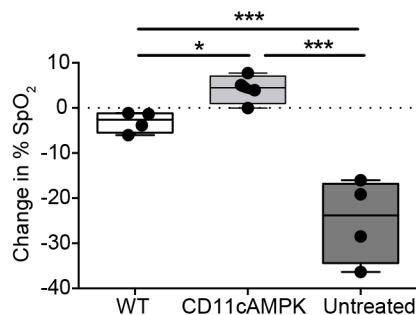

**Figure S3. AMPK status of CD4<sup>+</sup> T cells does not alter worm expulsion.** Splenic WT and CD11cAMPK -derived CD4<sup>+</sup> T cells were magnetically sorted (74% purity by flow cytometry).  $5-6 \times 10^6$  live cells were injected intraperitoneally into RAG1<sup>-/-</sup> mice (Jackson Labs # 002216). Mice were infected with 750 L<sub>3</sub> *N.b.* for 9 days. Controls mice were also infected. A) Quantification of adult worms in small intestine 9 dpi. B) Number of hookworm eggs per gram of feces 6-8 dpi. C) Change in % SpO<sub>2</sub> 3 dpi. Data represents 4 mice per group. \* $p < 0.05$ , \*\*\* $p < 0.001$ .
